# Supplementary material
Source: PubMed Central journal article supplement (PMC5542640)

YMTHE, Volume 25

## **Supplemental Information**

### **lncRNA HOXD-AS1 Regulates Proliferation and Chemo-Resistance of Castration-Resistant Prostate Cancer via Recruiting WDR5**

**Peng Gu, Xu Chen, Ruihui Xie, Jinli Han, Weibin Xie, Bo Wang, Wen Dong, Changhao Chen, Meihua Yang, Junyi Jiang, Ziyue Chen, Jian Huang, and Tianxin Lin**

Supplemental Information

Supplemental Figures

Figure S1

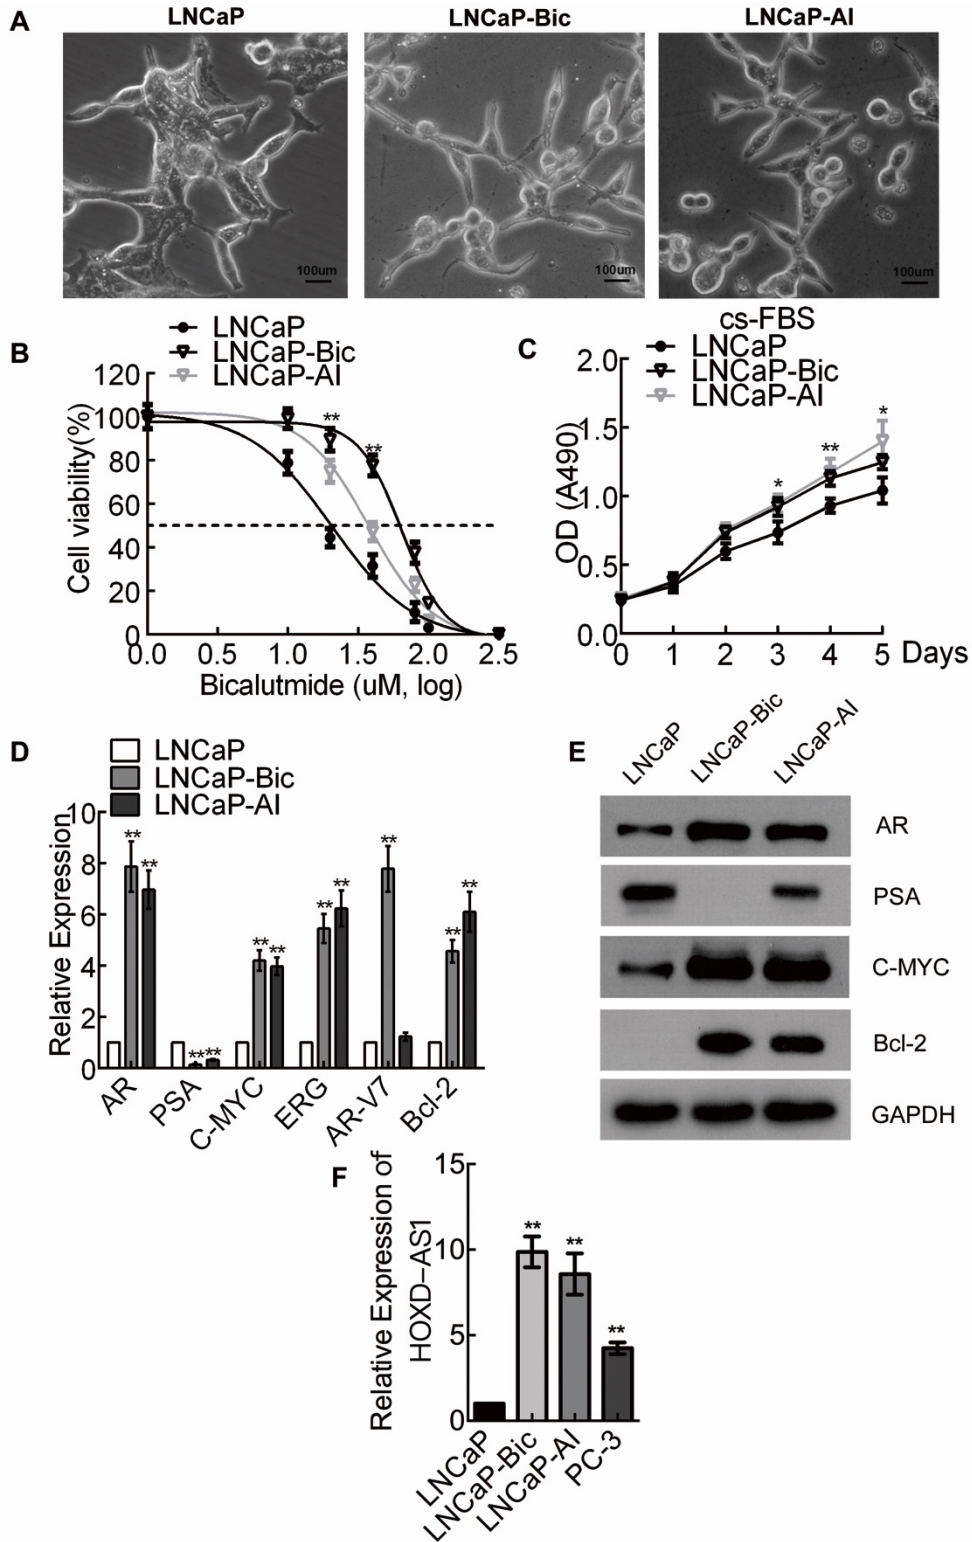

Figure S2

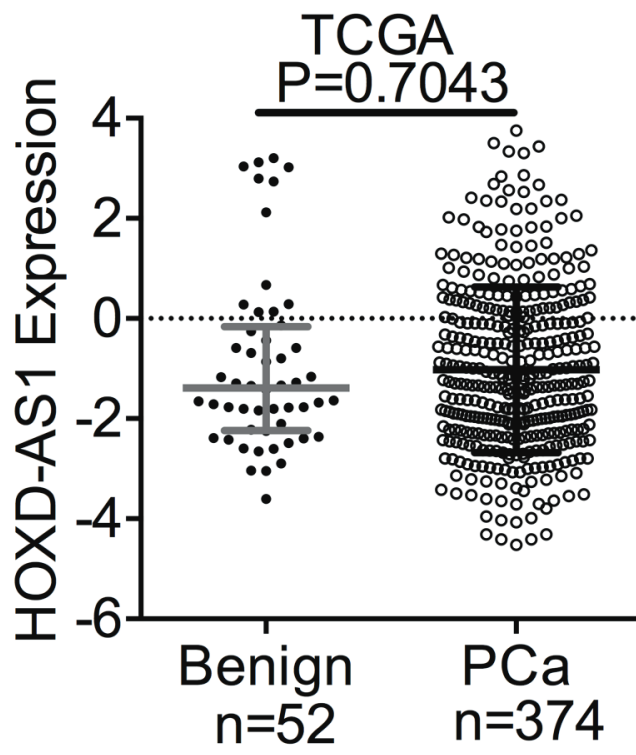

Figure S3

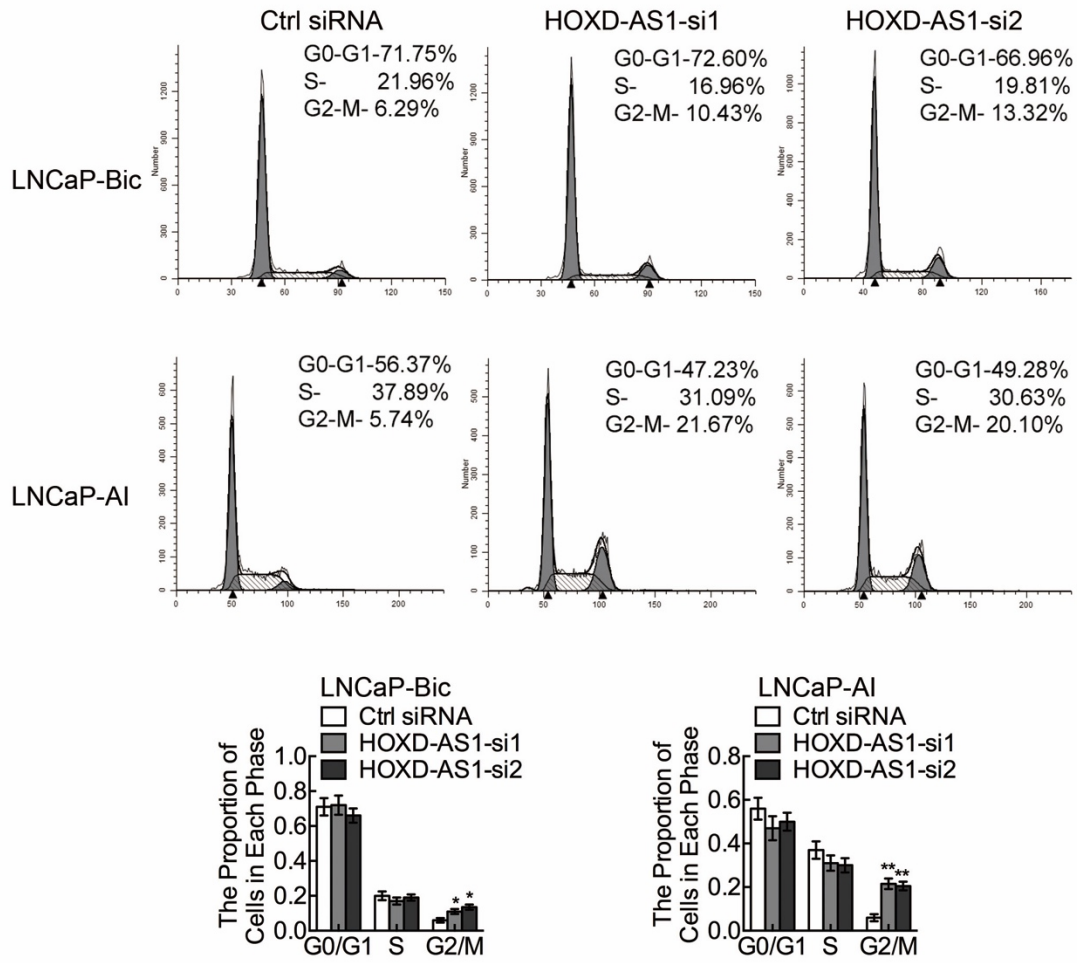

**Figure S4**

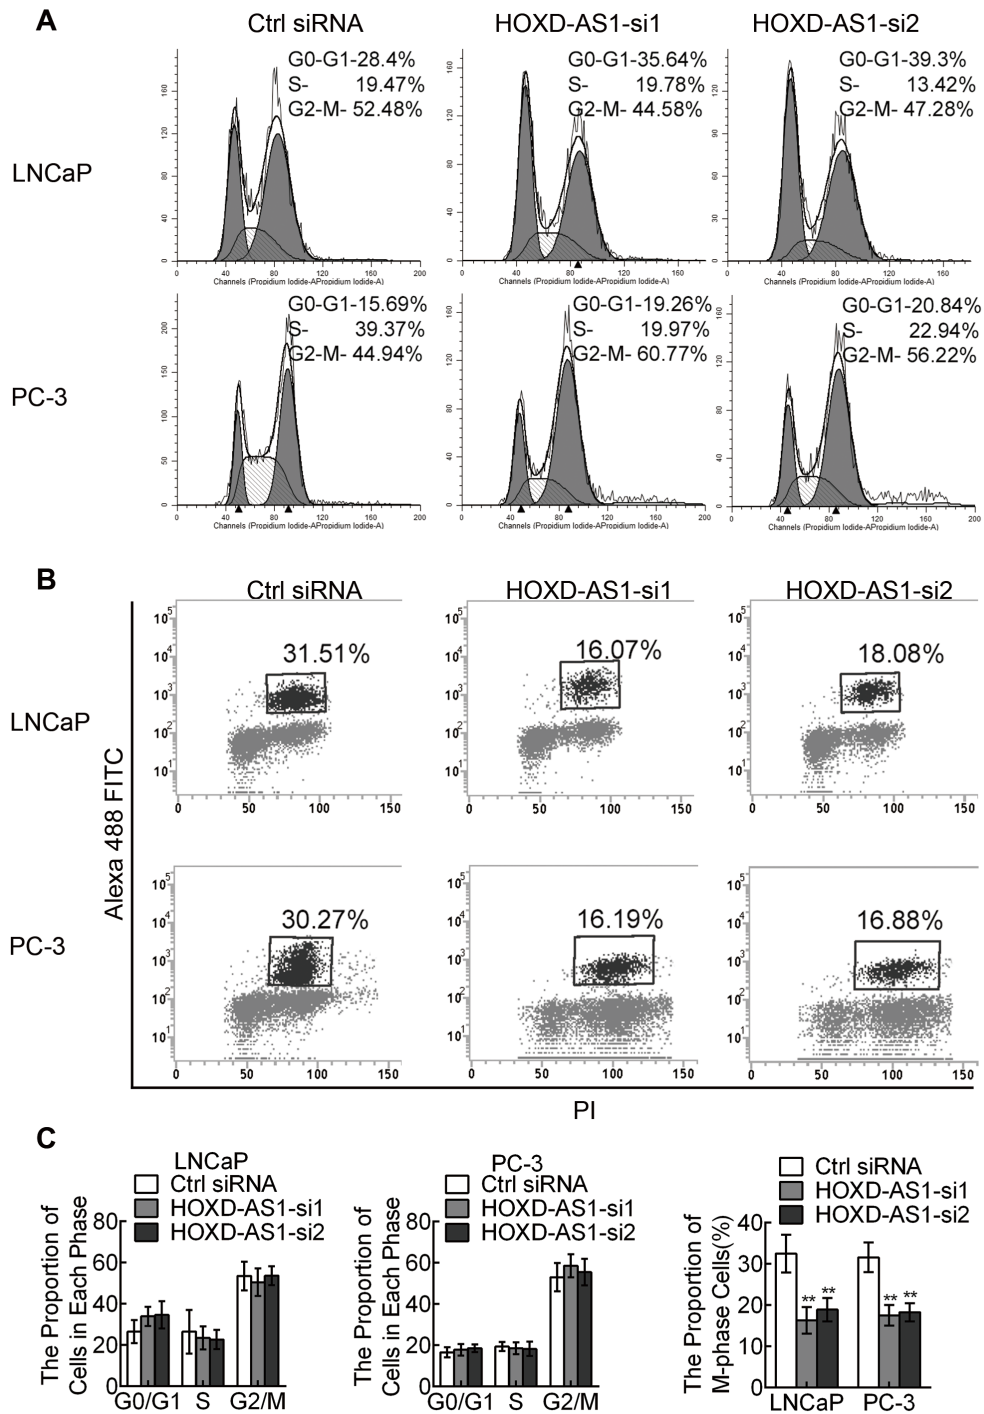

Figure S5

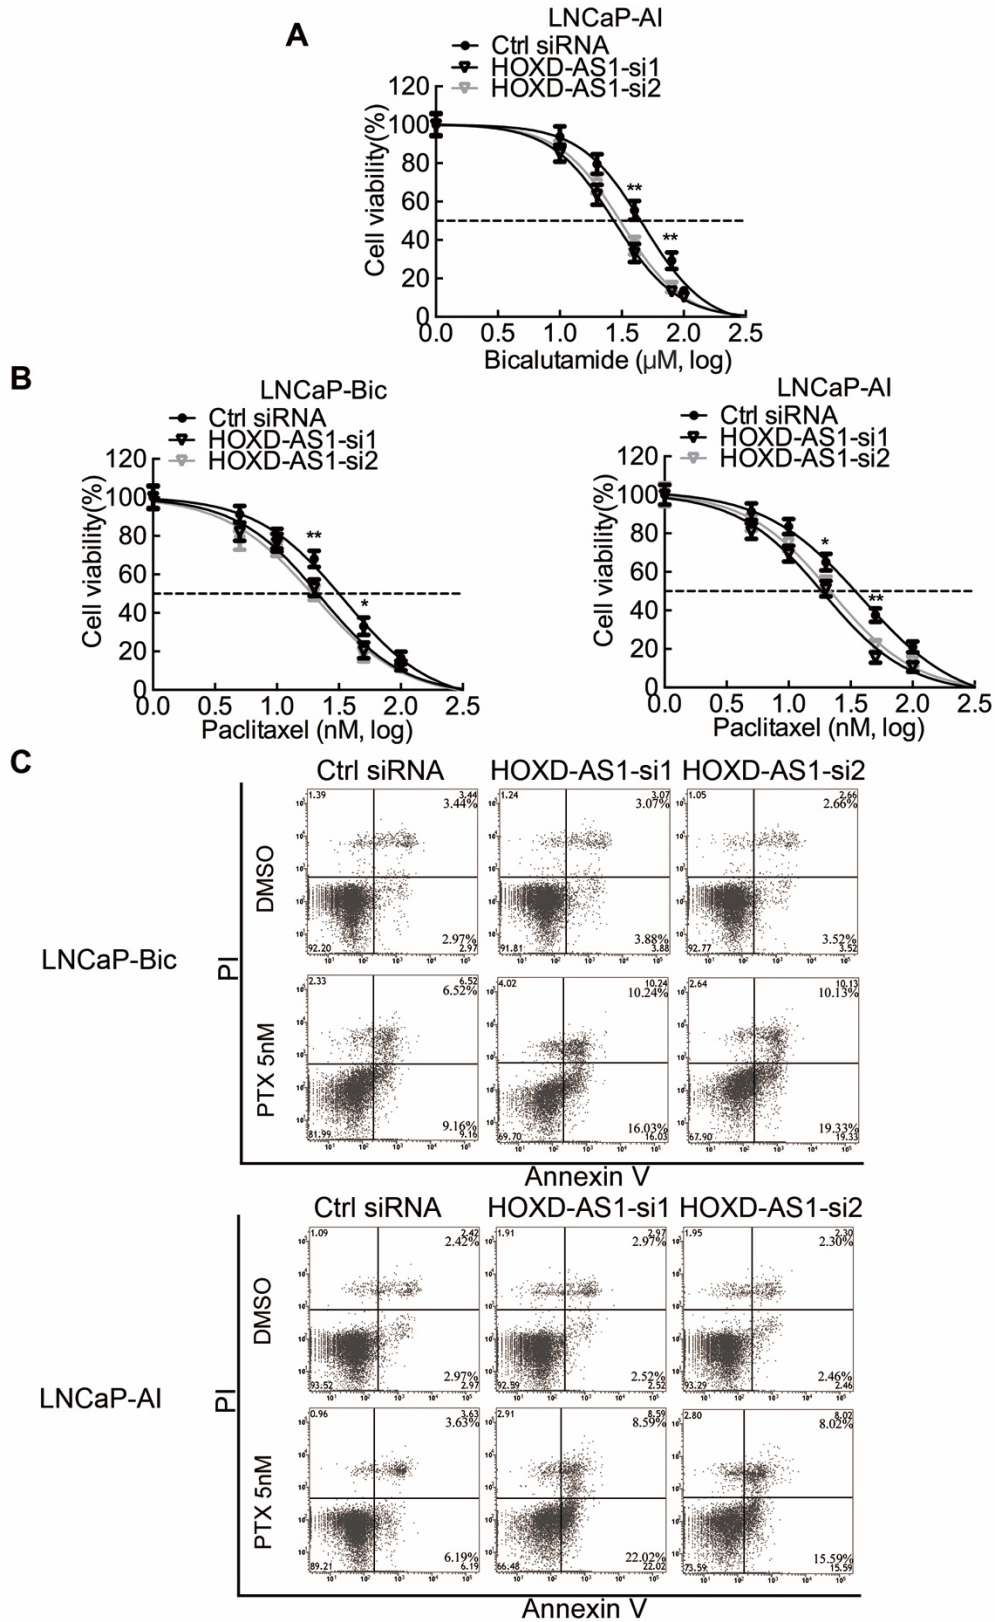

Figure S6

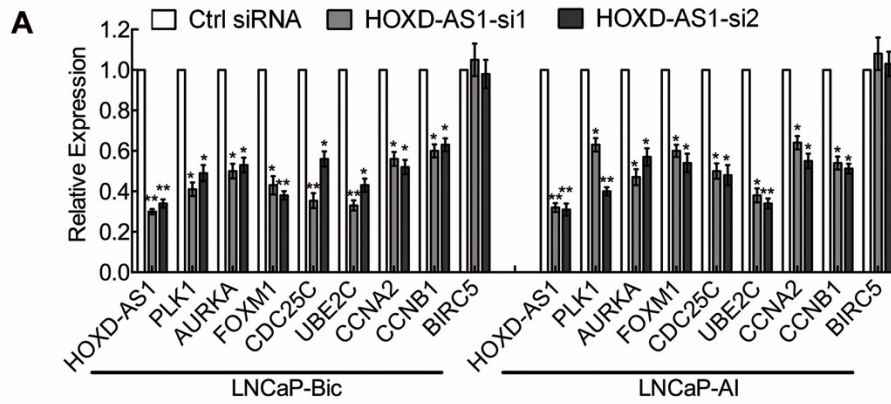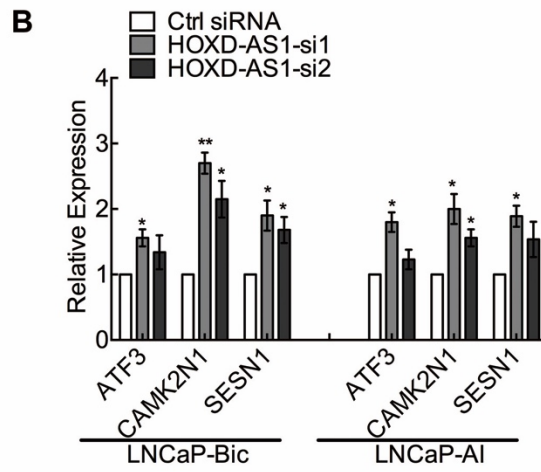

Figure S7

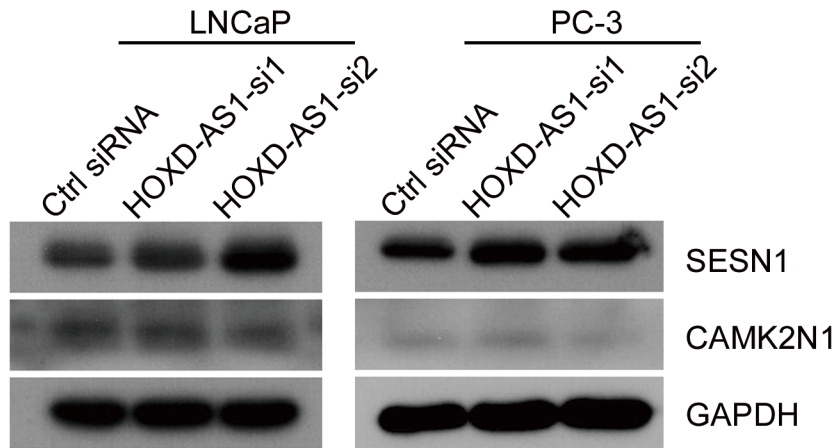



**Figure S8**

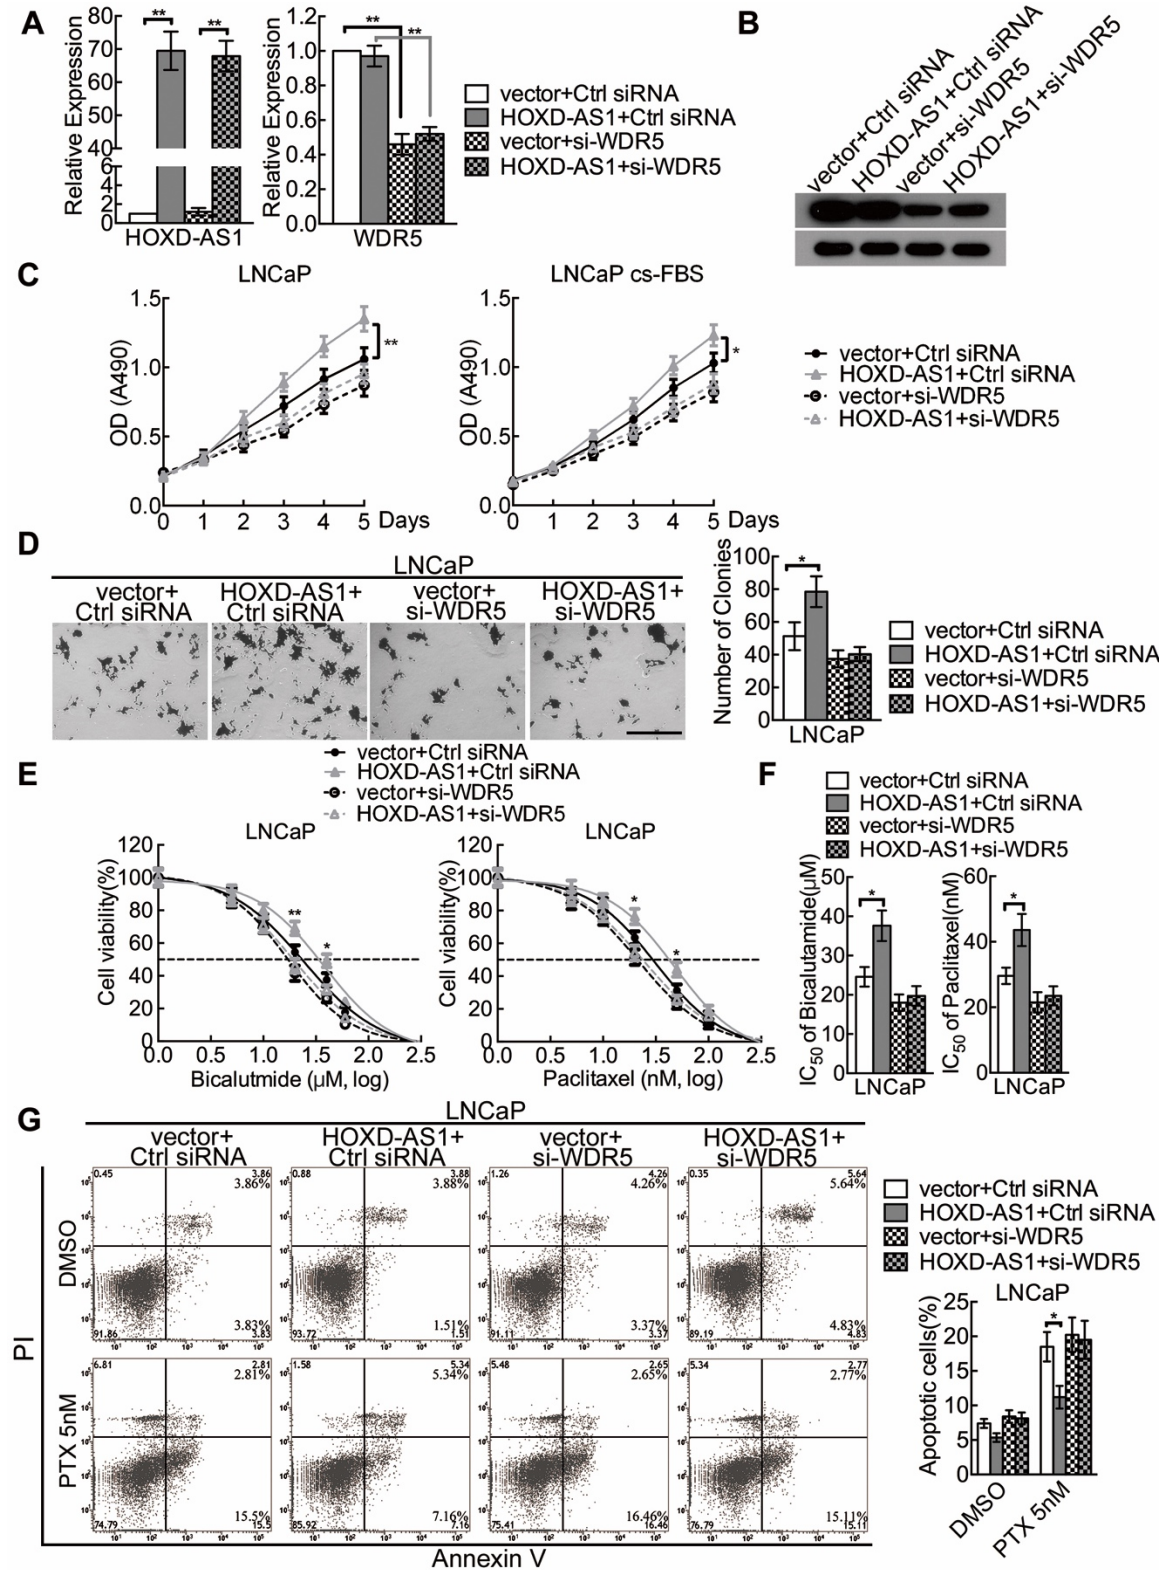

## Supplemental Figure Legends

**Figure S1.** Construction of castration resistant LNCaP sublines. (A) The morphology of LNCaP, LNCaP-bic and LNCaP-AI cells. The scale bar is equal to 100 $\mu$ m. (B) The viability of LNCaP, LNCaP-bic and LNCaP-AI cells treated with different concentration of bicalutamide measured by MTT. The results are presented as the means  $\pm$  SD of values obtained in three independent experiments. (C) The proliferation of LNCaP, LNCaP-bic and LNCaP-AI in androgen deprived cultural medium measured by MTT. The results are presented as the means  $\pm$  SD of values obtained in three independent experiments. (D and E) The castration resistance related genes were detected by real time qPCR and Western blotting. The results are presented as the means  $\pm$  SD of values obtained in three independent experiments. (F) The expression of HOXD-AS1 in LNCaP, LNCaP-Bic, LNCaP-AI and PC-3 cells was detected by real time qPCR. The results are presented as the means  $\pm$  SD of values obtained in three independent experiments. \* $p < 0.05$ , \*\* $p < 0.01$ .

**Figure S2.** The expression of HOXD-AS1 between benign prostate and prostate cancer from TCGA. The whiskers indicate mean  $\pm$  SD in the plot.

**Figure S3.** Knockdown of HOXD-AS1 inhibits castration resistant prostate cancer cell proliferation by inducing G2/M cell cycle arrest. LNCaP-Bic and LNCaP-AI cells were transfected with HOXD-AS1 siRNAs or control siRNA for 48h and the cell cycles were analyzed by flow cytometry. All histograms show the percentage (%) of cell populations in each phase from three independent experiments. \* $p < 0.05$ , \*\* $p < 0.01$ .

**Figure S4.** The influence of knockdown HOXD-AS1 on prostate cancer cells synchronized at M-phase. (A) LNCaP and PC-3 cells were transfected with HOXD-AS1 siRNAs or control siRNA for 48h, then treated with 50ng/ml nocodazole for 16h and the cell cycles were measured by flow cytometry. (B) LNCaP and PC-3 cells were transfected with HOXD-AS1 siRNAs or control siRNA for 48h, then treated with 50ng/ml nocodazole for 16h, the proportion of M-phase cells were measured by flow cytometry. (C) The histogram showed the percentage (%) of cells in different phase from three independent experiments. \* $p < 0.05$ , \*\* $p < 0.01$ .

**Figure S5.** Downregulation of HOXD-AS1 represses castration-resistance and chemo-resistance of prostate cancer cells. (A) The viability of LNCaP-AI cells transfected with HOXD-AS1 siRNAs or control siRNA, treated with bicalutamide for 120h and analyzed by MTT assay. The results are presented as the means  $\pm$  SD of values obtained in three independent experiments. (B) The viability of LNCaP-Bic and LNCaP-AI cells transfected with HOXD-AS1 siRNAs or control siRNA, treated with paclitaxel for 48h and analyzed by MTT assay. The results are presented as the means  $\pm$  SD of values obtained in three independent experiments. (C) The LNCaP-Bic and LNCaP-AI cells transfected with control or HOXD-AS1 siRNAs were treated with 5 nM paclitaxel for 48h. The percentage of apoptotic cells was analyzed by flow cytometer. \* $p < 0.05$ , \*\* $p < 0.01$ .

**Figure S6.** (A and B) The differentially expressed genes in the microarray were verified in LNCaP-Bic and LNCaP-AI cells by real time qPCR. The results are presented as the means  $\pm$  SD of values obtained in three independent experiments.

**Figure S7.** The expression of SENS1 and CAMK2N1 after HOXD-AS1 knockdown in LNCaP and PC-3 cells was detected by western blotting. GAPDH was used as internal control.

**Figure S8.** The in vitro effect of combined overexpression of HOXD-AS1 and knockdown of WDR5 in LNCaP cells. (A) The efficiency of combined overexpression of HOXD-AS1 and knockdown of WDR5 was detected by real time qPCR. The results are presented as the means  $\pm$  SD of values obtained in three independent experiments. (B) The efficiency of combined overexpression of HOXD-AS1 and knockdown of WDR5 was detected by western blotting. (C) The influence of enforced expression of HOXD-AS1 combined with knockdown of WDR5 on viability of LNCaP cells in normal medium and androgen ablated medium, as measured by MTT. The results are presented as the means  $\pm$  SD of values obtained in three independent experiments. (D) The influence of enforced expression of HOXD-AS1 combined with knockdown of WDR5 on colony formation ability of LNCaP cells. The scale bar is equal to 600 $\mu$ m. The histogram showed the the mean $\pm$  SD of clones from three independent experiments. (E) The effect of overexpression of HOXD-AS1 combined with knockdown of WDR5 on sensitivity of bicalutamide and paclitaxel in LNCaP cells. The results are presented as the means  $\pm$  SD of values obtained in three independent experiments. (F) Calculation of IC<sub>50</sub> of bicalutamide and paclitaxel of LNCaP cells co-transfected with HOXD-AS1 vector and WDR5 siRNA. (G) The LNCaP cells co-transfected with HOXD-AS1 expression vector and WDR5 siRNA were treated with 5 nM paclitaxel for 48h. The percentage of apoptotic cells was analyzed by flow cytometer. The histogram showed the percentage (%) of late and early apoptotic cells from three independent experiments.

## Tables

**Table S1.** Characteristics of patients from the TCGA Prostate adenocarcinoma (PRAD) cohort.

|                           | PCa profiles (%) | Tumor tissues for survival analysis (%) |
|---------------------------|------------------|-----------------------------------------|
| <b>Patients(N)</b>        | 374              | 309                                     |
| <b>Age(Year)</b>          |                  |                                         |
| Median(range)             | 61.23(42-78)     | 61.27(42-78)                            |
| Mean±SD                   | 60.98±6.72       | 60.92±6.78                              |
| <b>Gleason Score</b>      | 374              | 309                                     |
| 6                         | 26(7)            | 22(7)                                   |
| 7                         | 230(61.5)        | 187(60.4)                               |
| 8                         | 43(11.5)         | 37(12)                                  |
| 9                         | 72(19.2)         | 61(20)                                  |
| 10                        | 3(0.8)           | 2(0.6)                                  |
| <b>T stage</b>            | 368              | 309                                     |
| T2                        | 161(43.7)        | 136(44)                                 |
| T3                        | 202(54.9)        | 169(54.7)                               |
| T4                        | 5(1.4)           | 4(1.3)                                  |
| <b>Lymph nodes status</b> |                  |                                         |
| <b>N(%)</b>               | 316              | 309                                     |
| Negative                  | 270(85.4)        | 270(87.4)                               |
| Positive                  | 46(14.6)         | 39(12.6)                                |

Patients with not available clinical data were excluded for further analysis.

**Table S2.** The primers used in real time qPCR are listed as follows.

| Primer Name      | Sequence 5'-3'         |
|------------------|------------------------|
| HOXD-AS1 Forward | ACCTGCCTCTACTACTGCAAA  |
| HOXD-AS1 Reverse | GCAAAGACAATATAAGGGCCC  |
| NEAT1 Forward    | TTCTAAATTGAGCCTCCGGTC  |
| NEAT1 Reverse    | CTGCAAGCTCCATCTACAAGG  |
| GAS5 Forward     | GCTTAAGTGCCTGCATTCCG   |
| GAS5 Reverse     | TTGCCATTAACCGATGTCGAG  |
| MEG3 Forward     | TTCACCTACCTCACAGGGCTG  |
| MEG3 Reverse     | TTATTGAGAGCACAGTGGGGT  |
| CDKN1A Forward   | AGCGATGGAACCTTCGACTTTG |
| CDKN1A Reverse   | GGGAAGGTAGAGCTTGGGCAG  |
| ELF3 Forward     | ATCCCACTGATGGCAAGCTCT  |
| ELF3 Reverse     | CGAGACAGTCCCAGTACTCTT  |
| SESN1 Forward    | CTCTTGCCTCATTACATTCG   |

|                 |                            |
|-----------------|----------------------------|
| SESN1 Reverse   | GTAATGTCACAGATGCAGTAG      |
| CAMK2N1 Forward | TGCAGGACACCAACAACCTTCT     |
| CAMK2N1 Reverse | TCAATAACAACCCGCTTGCTC      |
| ATF3 Forward    | CATCACAAAAGCCGAGGTAGC      |
| ATF3 Reverse    | AGGCACTCCGTCTTCTCCTTC      |
| PLK1 Forward    | CCGCCCAACCATTAACGAGCT      |
| PLK1 Reverse    | ACCTTGGTGGAAATGGTCAGGC     |
| PTTG1 Forward   | GGAGTGCCTCTCATGATCCTT      |
| PTTG1 Reverse   | AGGAGACTGCAACAGATTGGA      |
| AURKA Forward   | CAAATGCCCTGTCTTACTGTC      |
| AURKA Reverse   | ATGGAGCATGTACTIONGACCACC   |
| CDC25C Forward  | TTTCTGAAGAAGCCCATCGTC      |
| CDC25C Reverse  | ACCTGTCTCTTCACGCAGAC       |
| NEK2 Forward    | AGGATTACCATCGACCTTCTG      |
| NEK2 Reverse    | GCTCTCCTAATTGTCGCCCTC      |
| CCNA2 Forward   | GAAGAAACAGCCAGACATCAC      |
| CCNA2 Reverse   | GTAGTTCACAGCCAAATGCAG      |
| UBE2C Forward   | ACTCAAGATTCTAGCAAGCCC      |
| UBE2C Reverse   | GCATGTGTGTTCAAGGACTA       |
| FOXM1 Forward   | GAGGACCTTTTAAGACACCCA      |
| FOXM1 Reverse   | GGCTGAAATCCAGTCCCCCTA      |
| BIRC5 Forward   | CTTTCTCAAGGACCACCGCAT      |
| BIRC5 Reverse   | CAAGTCTGGCTCGTTCTCAGT      |
| CCNB1 Forward   | TTGGAGAGGTTGATGTCGAGC      |
| CCNB1 Reverse   | AGAAGGAGGAAAGTGCACCAT      |
| U6 Forward      | CTCGTTCGGCAGCACATATAC      |
| U6 Reverse      | AACGCTTCACGAATTTGCGTGTC    |
| MALAT1 Forward  | GACGGAGGTTGAGATGAAGC       |
| MALAT1 Reverse  | ATTCGGGGCTCTGTAGTCCT       |
| HOTTIP Forward  | ATCAAGGTTGGCCGCTGACTC      |
| HOTTIP Reverse  | TGGTCTGTTGGTTAGCACCTG      |
| AR Forward      | TGAGCAGAGTGCCCTATCCCA      |
| AR Reverse      | CTGGGGTGGAAAGTAATAGTC      |
| AR-V7 Forward   | CCATCTTGTCGTCTTCGGAAATGTTA |
| AR-V7 Reverse   | TTTGAATGAGGCAAGTCAGCCTTCT  |
| PSA Forward     | GTATCACGTCATGGGGCAGTG      |
| PSA Reverse     | GTTGGCCACGATGGTGTCTT       |
| C-MYC Forward   | AATAGAGCTGCTTCGCTAGA       |
| C-MYC Reverse   | GAGGTGGTTCATACTGAGCAAG     |
| GPADH Forward   | CAAGGCTGAGAACGGGAAG        |

|               |                     |
|---------------|---------------------|
| GPADH Reverse | TGAAGACGCCAGTGGACTC |
|---------------|---------------------|

**Table S3.** The primers used in ChIP-real time qPCR are listed as follows.

| Primer Name        | Sequence 5'-3'        |
|--------------------|-----------------------|
| PLK1-P Forward     | TGGGTCCGGGTTTAAAGGCTG |
| PLK1-P Reverse     | GCTCCTCCCCGAATTCAAACG |
| AURKA-P Forward    | CAAGGCGTCGGGTTTGTGTC  |
| AURKA-P Reverse    | AAGTCTTCCAAGAGCTCAGCC |
| CDC25C-P Forward   | AAAGAGGGAAGGAGGGAGGGA |
| CDC25C-P Reverse   | CTACTCTCCTCAGGGACTCGT |
| FOXM1-P Forward    | AGCCCGGAATGCCGAGACAA  |
| FOXM1-P Reverse    | GGCACCGGAGCTTTCAGTTTG |
| UBE2C-P Forward    | GGCAGCATCATCTACCAATCG |
| UBE2C-P Reverse    | TGATCCAGCCAATGAGACGCT |
| CCNA2-P Forward    | CCCAGCCAGTTTGTCTCTCC  |
| CCNA2-P Reverse    | CCGCGACTATTGAAATGGACC |
| CCNB1-P Forward    | CGCCCTGGAAACGCATTCTCT |
| CCNB1-P Reverse    | AGAAGAGCCAGCCTAGCCTCA |
| BIRC5-P Forward    | TGTTGGGATTACAGGCGTGAG |
| BIRC5-P Reverse    | TGTGCCGGGAGTTGTAGTCCT |
| Negative control F | GTAATCAGGAAACTGCATAC  |
| Negative control R | CTCAAGACTCAATAGTGATC  |

**Table S4.** The probes used for ChIRP are listed as follows.

| Probe Name        | Sequence 5'-3'         |
|-------------------|------------------------|
| HOXD-AS1-probe1   | CTGCCCTACAAATACCATAT   |
| HOXD-AS1- probe2  | CCTTCTTTCAGAACTTGGC    |
| HOXD-AS1- probe3  | GCTGCTAACATTGCTGAACA   |
| HOXD-AS1- probe4  | AGAATGGCCAGCTGCAAAAC   |
| HOXD-AS1- probe5  | CCGAGTCTCAGAAGCAGAAA   |
| HOXD-AS1- probe6  | CCGAGACTTCTAATAGCTCG   |
| HOXD-AS1- probe7  | TGCATCCATAGGCAGAATTT   |
| HOXD-AS1- probe8  | CGCATCTCTATTTGGTTTGA   |
| HOXD-AS1- probe9  | GCCTTCTTTCTAGACACAAT   |
| HOXD-AS1- probe10 | ATTGGTTCTCGGGATACTTG   |
| TERC-probe-1      | AGGGTTAGACAAAAAATGGCCA |
| TERC-probe-2      | AATGAACGGTGAAGGCGGCAG  |
| TERC-probe-3      | GTTCGGGGGCTGGGCAGGCGAC |
| TERC-probe-4      | GAGAGACCCGCGGCTGACAGAG |

|              |                        |
|--------------|------------------------|
| TERC-probe-5 | ACGTCCCACAGCTCAGGGAATC |
|--------------|------------------------|

**Table S5.** The primers used for ChIRP-real time qPCR are listed as follows.

| Primer Name    | Sequence 5'-3'        |
|----------------|-----------------------|
| PLK1-chirp-F   | TGGGTCCGGGTTTAAAGGCTG |
| PLK1-chirp-R   | GCTCCTCCCCGAATTCAAACG |
| AURKA-chirp-F  | ACGGCTGAGCTCTTGGAAGAC |
| AURKA-chirp-R  | CTCGTCCGCCACTGAGATATC |
| CDC25C-chirp-F | AAAGAGGGAAGGAGGGAGGGA |
| CDC25C-chirp-R | CTACTCTCCTCAGGGACTCGT |
| FOXM1-chirp-F  | TTCGGAGCTACGGCCTAACG  |
| FOXM1-chirp-R  | CTGGGACTCCATTGCTGCAT  |
| UBE2C-chirp-F  | GGCAGCATCATCTACCAATCG |
| UBE2C-chirp-R  | TGATCCAGCCAATGAGACGCT |
| CCNA2-chirp-F  | CCCCAGCCAGTTTGTTCCTCC |
| CCNA2-chirp-R  | CCGCGACTATTGAAATGGACC |
| CCNB1-chirp-F  | CGCCCTGGAAACGCATTCTCT |
| CCNB1-chirp-R  | AGAAGAGCCAGCCTAGCCTCA |
| BIRC5-chirp-F  | TGTTGGGATTACAGGCGTGAG |
| BIRC5-chirp-R  | TGTGCCGGGAGTTGTAGTCCT |
| GAPDH-RNA-F    | CAAGGCTGAGAACGGGAAG   |
| GAPDH-RNA-R    | TGAAGACGCCAGTGGACTC   |
| GAPDH-DNA-F    | GTTTCCAGGAGTGCCTTTGTG |
| GAPDH-DNA-R    | ATTAGGGCAGACAATCCCGGC |
| TERC-RNA-F     | CGCTGTTTTTCTCGCTGACT  |
| TERC-RNA-R     | GCTCTAGAATGAACGGTGGAA |
| WNT-1-F        | AGGGCTGGAATTTCAAAGGT  |
| WNT-1-R        | TTCTCCTCAGGATGTACCCG  |

## Supplemental Material and Method

### HOXD-AS1 cloning and vector transfection

The HOXD-AS1 was amplified by PCR using primer F- GTTTGTGCCGCGCGCCCGCCAGACC and R- TGACACTTTGAAAAAATATTTTAT. And then cloned into pCDNA3.1(+) vector. Co-transfection of vector and WDR5 siRNA was performed by using Lipofectamine 3000 (Life Technologies, Waltham, MA, USA) according to the manufacture's protocol.

The full-length blots of manuscript are presented.

Figure 3G

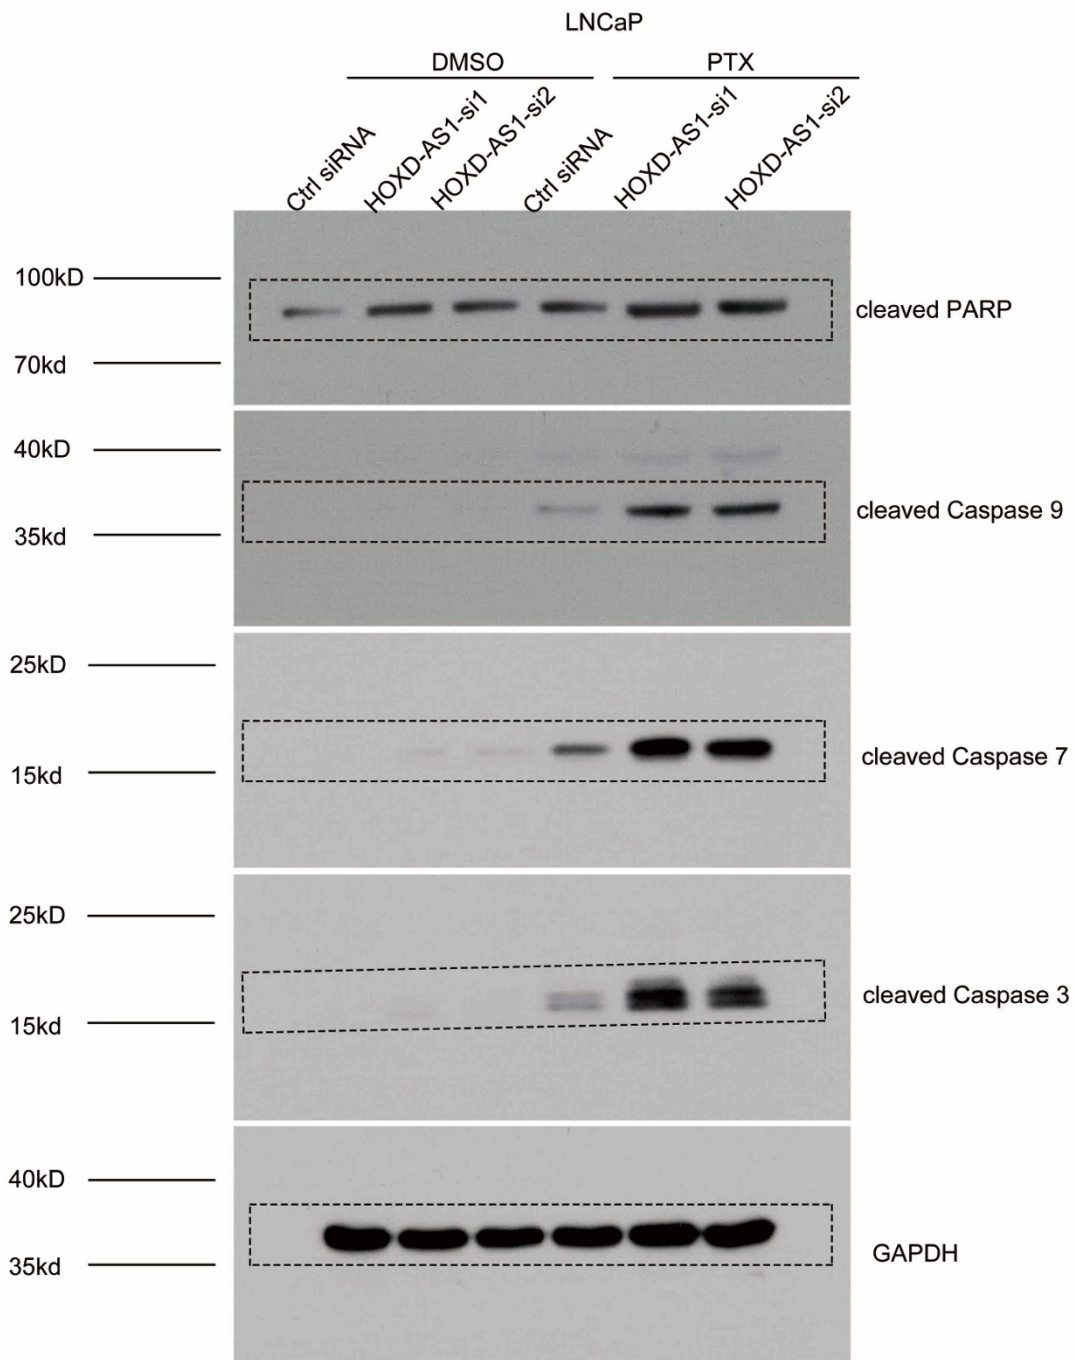



Figure 3G

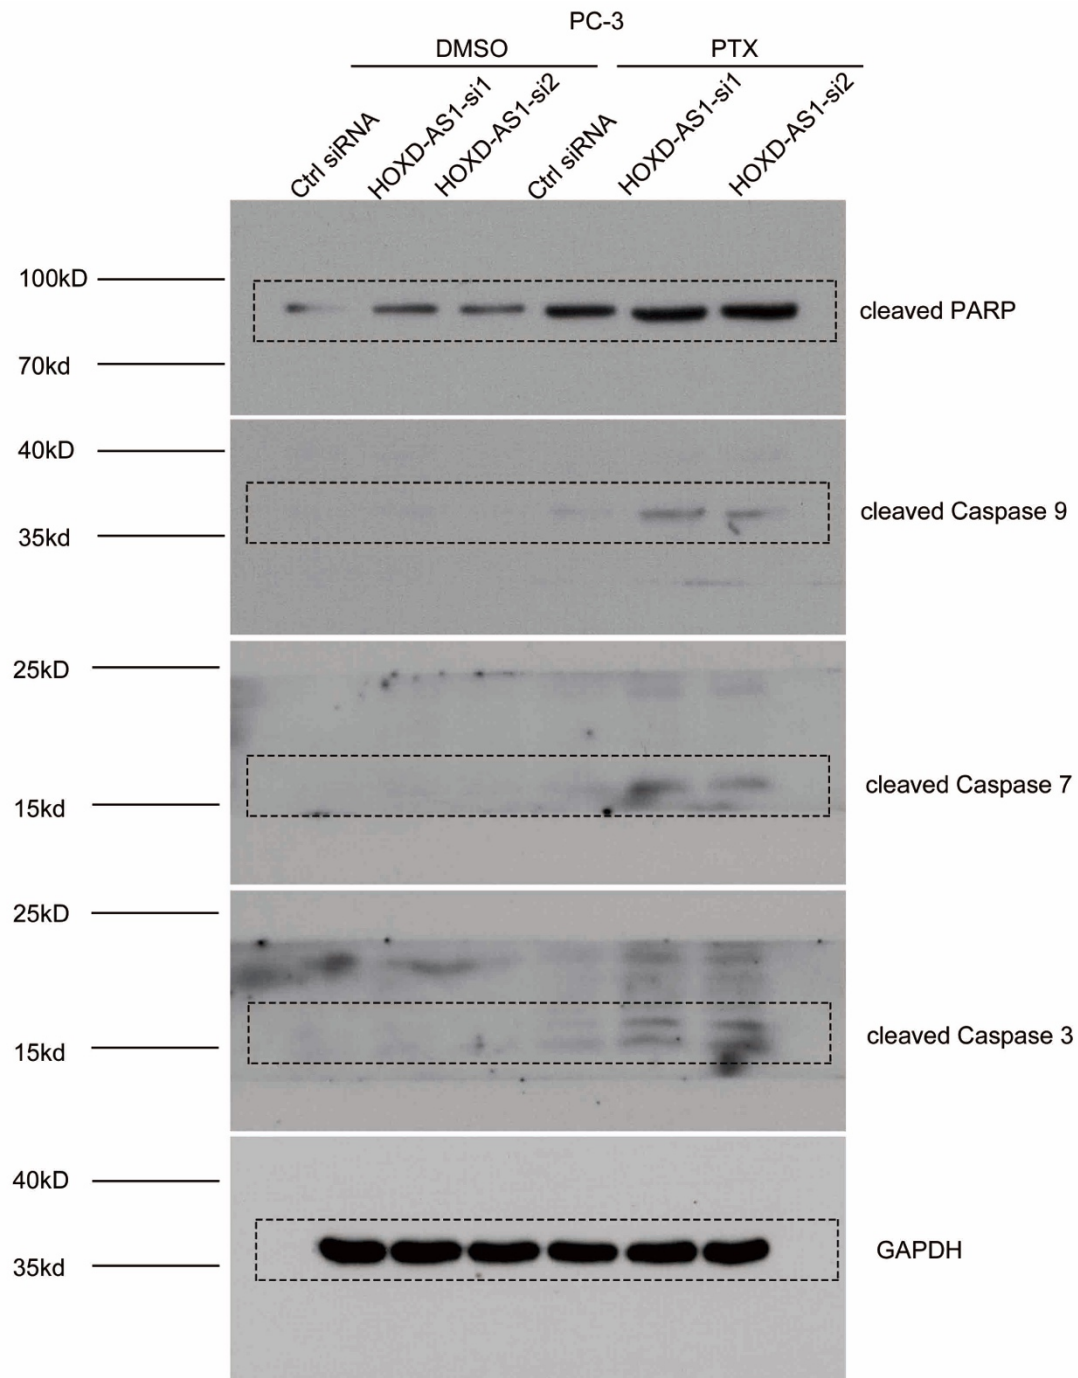

Figure 5G

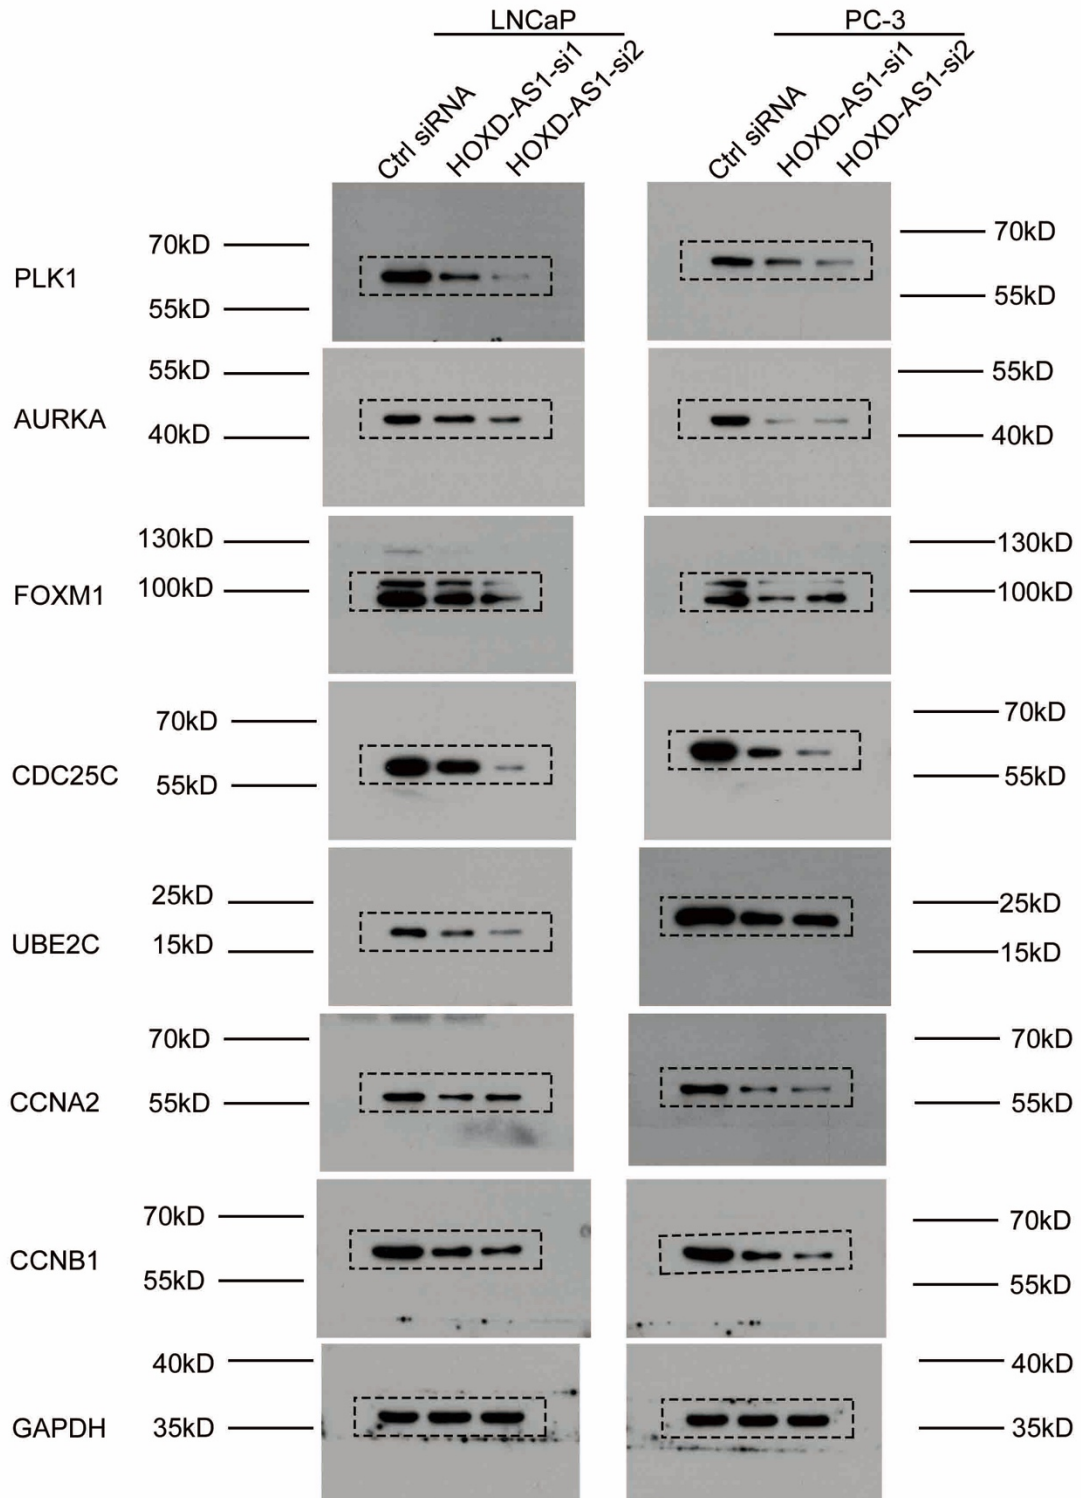

Figure 6B

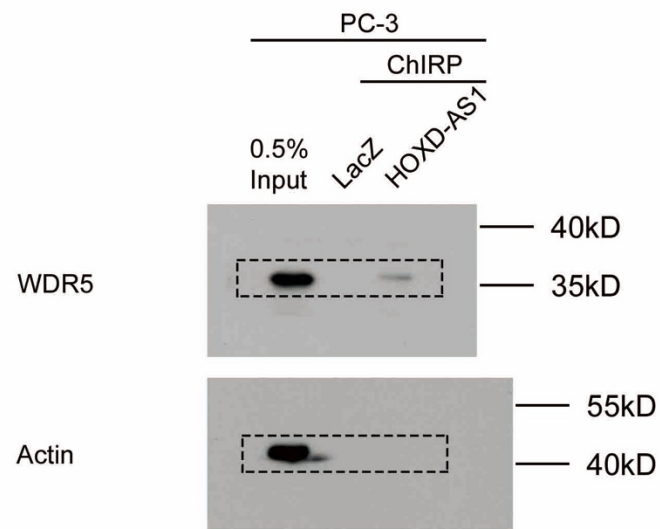

Figure 6D

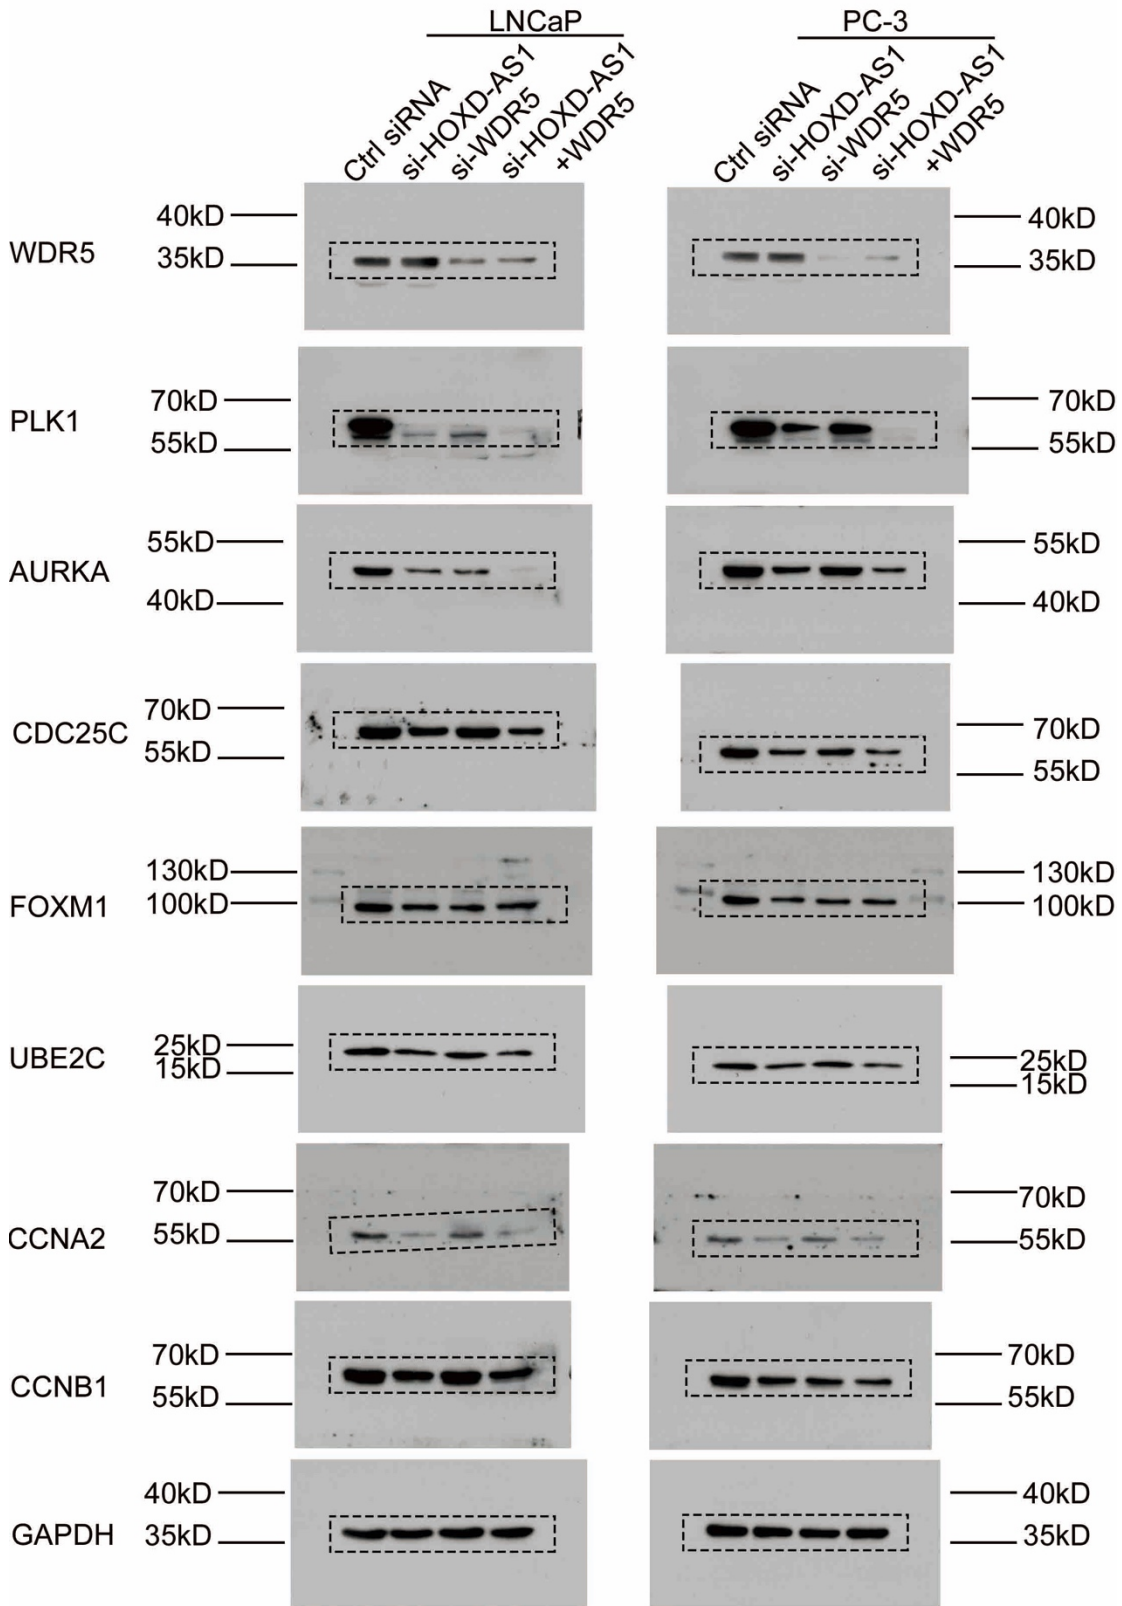



Figure S1E

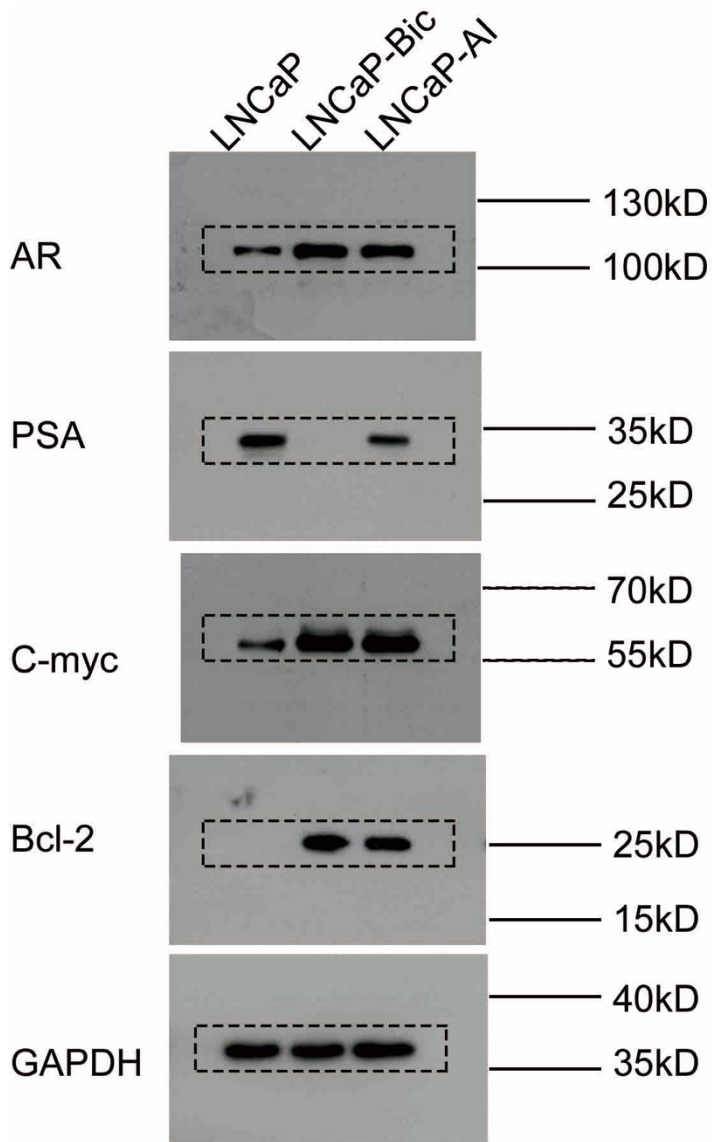

Figure S7

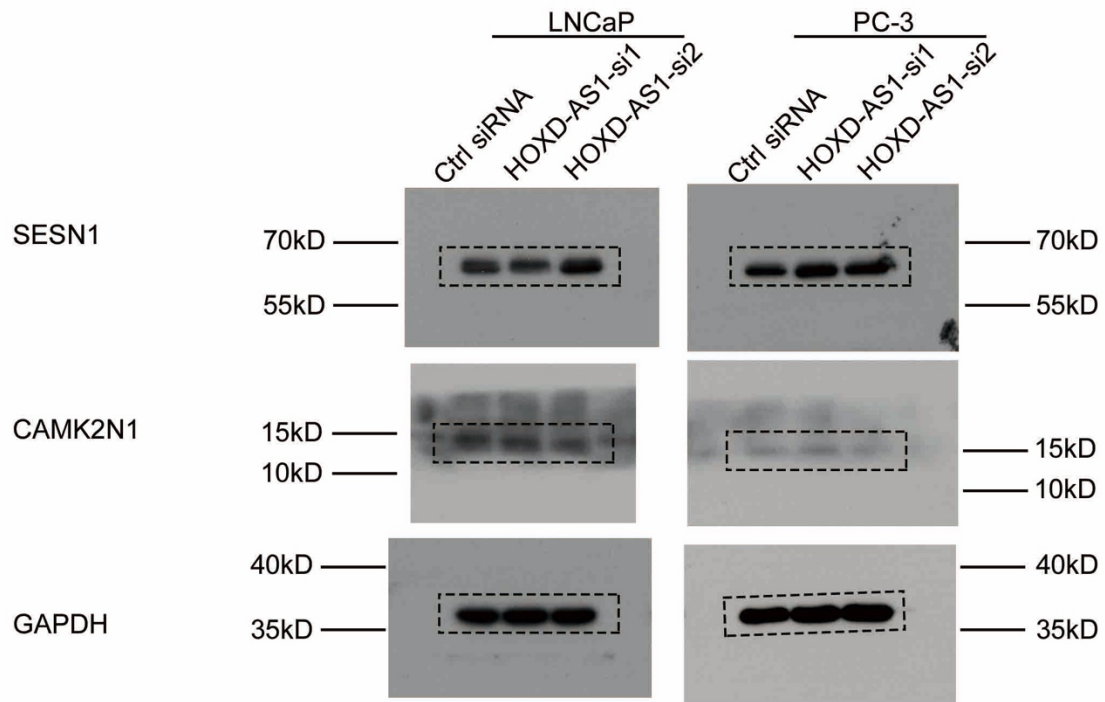

Figure S8B

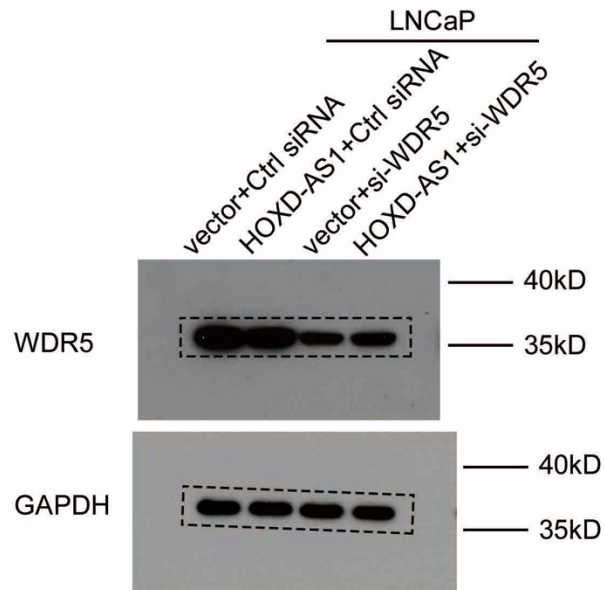

Supplement: mmc1.pdf [file mmc1.pdf]
